# Supplementary material for: Unravelling the Contribution of the rs7041 and rs4588 Polymorphisms of the GC Gene and Serum VDBP Levels for Developing Metabolic Syndrome in the Mexican Population
Source: MDPI journal article supplement (doi:10.3390/ijms231810581), 2022-09-13
Supplement: s1 [file s1]

**Table S1.** Association of GC gene variants with abdominal obesity by sex.

|                  | Total           |         | Men             |         | Women           |         |
|------------------|-----------------|---------|-----------------|---------|-----------------|---------|
|                  | OR (95% CI)     | P value | OR (95% CI)     | P value | OR (95% CI)     | P value |
| <b>rs7041</b>    |                 |         |                 |         |                 |         |
| TT               | Ref.            |         | Ref.            |         | Ref.            |         |
| TG               | 1.23(0.90-1.69) | 0.190   | 1.36(0.84-2.20) | 0.207   | 1.23(0.81-1.87) | 0.328   |
| GG               | 1.12(0.77-1.62) | 0.561   | 0.81(0.46-1.41) | 0.452   | 1.57(0.93-2.66) | 0.091   |
| TT               | Ref.            |         | Ref.            |         | Ref.            |         |
| GG+GG            | 1.20(0.89-1.60) | 0.234   | 1.16(0.74-1.81) | 0.523   | 1.33(0.89-1.97) | 0.161   |
| TT+TG            | Ref.            |         | Ref.            |         | Ref.            |         |
| GG               | 0.98(0.71-1.34) | 0.887   | 0.65(0.41-1.05) | 0.079   | 1.38(0.87-2.17) | 0.170   |
| <b>rs4588</b>    |                 |         |                 |         |                 |         |
| CC               | Ref.            |         | Ref.            |         | Ref.            |         |
| CA               | 0.70(0.52-0.92) | 0.012   | 0.95(0.62-1.45) | 0.807   | 0.53(0.36-0.77) | 0.001   |
| AA               | 0.36(0.18-0.71) | 0.003   | 0.73(0.22-2.42) | 0.607   | 0.20(0.08-0.47) | 0.0002  |
| CC               | Ref.            |         | Ref.            |         | Ref.            |         |
| CA+AA            | 0.66(0.50-0.87) | 0.003   | 0.93(0.61-1.41) | 0.737   | 0.49(0.34-0.70) | 0.0001  |
| CC+CA            | Ref.            |         | Ref.            |         | Ref.            |         |
| AA               | 0.41(0.21-0.81) | 0.010   | 0.75(0.23-2.44) | 0.628   | 0.26(0.11-0.60) | 0.002   |
| <b>Diplotype</b> |                 |         |                 |         |                 |         |
| 1S/1S            | Ref.            |         | Ref.            |         | Ref.            |         |
| 1S/1F            | 1.30(0.88-1.91) | 0.185   | 1.82(1.05-3.16) | 0.034   | 1.00(0.58-1.75) | 0.986   |
| 1F/1F            | 1.42(0.82-2.43) | 0.208   | 1.26(0.58-2.73) | 0.560   | 1.41(0.64-3.11) | 0.390   |
| 2/2              | 0.44(0.21-0.93) | 0.032   | 0.98(0.28-3.44) | 0.978   | 0.21(0.08-0.56) | 0.002   |
| 2/1F             | 0.77(0.50-1.19) | 0.238   | 1.24(0.64-2.37) | 0.527   | 0.49(0.27-0.90) | 0.021   |
| 2/1S             | 0.87(0.58-1.31) | 0.509   | 1.42(0.77-2.63) | 0.262   | 0.58(0.33-1.02) | 0.058   |

Models adjusted for age, sex, vitamin D intake, smoking status, vitamin D deficiency and menopausal status (only women).

**Table S2.** Association of GC gene variants with reduced HDL-cholesterol levels by sex.

|                  | Total           |                | Men             |                | Women           |                |
|------------------|-----------------|----------------|-----------------|----------------|-----------------|----------------|
|                  | OR (95% CI)     | <i>P</i> value | OR (95% CI)     | <i>P</i> value | OR (95% CI)     | <i>P</i> value |
| <b>rs7041</b>    |                 |                |                 |                |                 |                |
| TT               | Ref.            |                | Ref.            |                | Ref.            |                |
| TG               | 1.34(1.07-1.69) | 0.012          | 1.20(0.80-1.81) | 0.373          | 1.41(1.07-1.86) | 0.016          |
| GG               | 1.50(1.13-1.97) | 0.004          | 1.40(0.85-2.30) | 0.192          | 1.53(1.09-2.13) | 0.014          |
| TT               | Ref.            |                | Ref.            |                | Ref.            |                |
| GG+GG            | 1.39(1.12-1.72) | 0.003          | 1.25(0.85-1.85) | 0.251          | 1.45(1.11-1.88) | 0.006          |
| TT+TG            | Ref.            |                | Ref.            |                | Ref.            |                |
| GG               | 1.24(0.98-1.57) | 0.074          | 1.23(0.81-1.88) | 0.329          | 1.23(0.92-1.65) | 0.156          |
| <b>rs4588</b>    |                 |                |                 |                |                 |                |
| CC               | Ref.            |                | Ref.            |                | Ref.            |                |
| CA               | 0.85(0.69-1.05) | 0.124          | 1.18(0.82-1.70) | 0.375          | 0.73(0.57-0.94) | 0.015          |
| AA               | 0.76(0.43-1.36) | 0.359          | 0.71(0.25-2.04) | 0.531          | 0.77(0.38-1.54) | 0.456          |
| CC               | Ref.            |                | Ref.            |                | Ref.            |                |
| CA+AA            | 0.84(0.69-1.03) | 0.098          | 1.14(0.80-1.63) | 0.474          | 0.73(0.57-0.94) | 0.014          |
| CC+CA            | Ref.            |                | Ref.            |                | Ref.            |                |
| AA               | 0.81(0.46-1.44) | 0.478          | 0.67(0.24-1.88) | 0.448          | 0.87(0.44-1.73) | 0.691          |
| <b>Diplotype</b> |                 |                |                 |                |                 |                |
| 1S/1S            | Ref.            |                | Ref.            |                | Ref.            |                |
| 1S/1F            | 0.93(0.70-1.22) | 0.588          | 0.75(0.47-1.22) | 0.247          | 1.06(0.75-1.51) | 0.745          |
| 1F/1F            | 0.65(0.45-0.94) | 0.023          | 0.46(0.23-0.93) | 0.030          | 0.76(0.49-1.19) | 0.232          |
| 2/2              | 0.68(0.37-1.25) | 0.210          | 0.65(0.21-2.01) | 0.459          | 0.69(0.33-1.44) | 0.321          |
| 2/1F             | 0.66(0.48-0.92) | 0.015          | 0.87(0.49-1.56) | 0.642          | 0.59(0.40-0.88) | 0.009          |
| 2/1S             | 0.85(0.62-1.15) | 0.282          | 1.00(0.58-1.72) | 0.988          | 0.80(0.55-1.16) | 0.234          |

Models adjusted for age, sex, VD intake, smoking status, body mass index categories, vitamin D deficiency and menopausal status (only women).

**Table S3.** Association of GC gene variants with elevated triglyceride levels by sex.

|                  | Total           |         | Men             |         | Women           |         |
|------------------|-----------------|---------|-----------------|---------|-----------------|---------|
|                  | OR (95% CI)     | P value | OR (95% CI)     | P value | OR (95% CI)     | P value |
| <b>rs7041</b>    |                 |         |                 |         |                 |         |
| TT               | Ref.            |         | Ref.            |         | Ref.            |         |
| TG               | 1.29(1.03-1.62) | 0.027   | 1.55(1.00-2.40) | 0.049   | 1.17(0.90-1.54) | 0.242   |
| GG               | 1.33(1.01-1.74) | 0.041   | 1.75(1.02-3.00) | 0.042   | 1.20(0.87-1.64) | 0.265   |
| TT               | Ref.            |         | Ref.            |         | Ref.            |         |
| TG+GG            | 1.30(1.05-1.61) | 0.016   | 1.60(1.06-2.43) | 0.026   | 1.18(0.92-1.52) | 0.194   |
| TT+TG            | Ref.            |         | Ref.            |         | Ref.            |         |
| GG               | 1.12(0.90-1.41) | 0.313   | 1.30(0.83-2.04) | 0.255   | 1.08(0.83-1.41) | 0.564   |
| <b>rs4588</b>    |                 |         |                 |         |                 |         |
| CC               | Ref.            |         | Ref.            |         | Ref.            |         |
| CA               | 0.87(0.71-1.06) | 0.163   | 0.78(0.53-1.15) | 0.213   | 0.91(0.72-1.16) | 0.445   |
| AA               | 0.84(0.47-1.50) | 0.548   | 0.76(0.24-2.36) | 0.631   | 0.87(0.44-1.71) | 0.679   |
| CC               | Ref.            |         | Ref.            |         | Ref.            |         |
| CA+AA            | 0.86(0.71-1.05) | 0.147   | 0.78(0.53-1.14) | 0.200   | 0.91(0.72-1.15) | 0.416   |
| CC+CA            | Ref.            |         | Ref.            |         | Ref.            |         |
| AA               | 0.88(0.50-1.57) | 0.677   | 0.84(0.27-2.57) | 0.754   | 0.90(0.46-1.76) | 0.755   |
| <b>Diplotype</b> |                 |         |                 |         |                 |         |
| 1S/1S            | Ref.            |         | Ref.            |         | Ref.            |         |
| 1S/1F            | 0.97(0.74-1.27) | 0.835   | 0.88(0.52-1.47) | 0.620   | 0.97(0.70-1.33) | 0.841   |
| 1F/1F            | 0.96(0.67-1.39) | 0.842   | 0.69(0.33-1.46) | 0.336   | 1.09(0.71-1.65) | 0.698   |
| 2/2              | 0.88(0.47-1.63) | 0.682   | 0.87(0.25-3.01) | 0.830   | 0.89(0.42-1.78) | 0.698   |
| 2/1F             | 0.64(0.46-0.88) | 0.006   | 0.47(0.25-0.88) | 0.017   | 0.71(0.49-1.04) | 0.083   |
| 2/1S             | 1.02(0.76-1.37) | 0.904   | 0.93(0.52-1.68) | 0.823   | 1.04(0.74-1.48) | 0.811   |

Models adjusted for age, sex, vitamin D intake, smoking status, body mass index categories, vitamin D deficiency and menopausal status (only women).

**Table S4.** Association of GC gene variants with elevated fasting plasma glucose ( $\geq 100$  mg/dL) or previously diagnosed type 2 diabetes by sex.

|                  | Total           |         | Men             |         | Women            |         |
|------------------|-----------------|---------|-----------------|---------|------------------|---------|
|                  | OR (95% CI)     | P value | OR (95% CI)     | P value | OR (95% CI)      | P value |
| <b>rs7041</b>    |                 |         |                 |         |                  |         |
| TT               | Ref.            |         | Ref.            |         | Ref.             |         |
| TG               | 0.98(0.78-1.24) | 0.887   | 0.91(0.60-1.39) | 0.662   | 1.02 (0.77-1.36) | 0.872   |
| GG               | 1.09(0.83-1.44) | 0.524   | 0.84(0.50-1.40) | 0.493   | 1.24(0.89-1.72)  | 0.211   |
| TT               | Ref.            |         | Ref.            |         | Ref.             |         |
| GG+GG            | 1.02(0.82-1.27) | 0.879   | 0.89(0.60-1.33) | 0.564   | 1.09(0.84-1.42)  | 0.522   |
| TT+TG            | Ref.            |         | Ref.            |         | Ref.             |         |
| GG               | 1.11(0.88-1.40) | 0.395   | 0.89(0.58-1.36) | 0.594   | 1.22(0.92-1.61)  | 0.168   |
| <b>rs4588</b>    |                 |         |                 |         |                  |         |
| CC               | Ref.            |         | Ref.            |         | Ref.             |         |
| CA               | 0.86(0.70-1.06) | 0.158   | 1.03(0.71-1.49) | 0.890   | 0.78(0.61-1.01)  | 0.059   |
| AA               | 1.02(0.56-1.83) | 0.953   | 1.09(0.37-3.21) | 0.875   | 0.96(0.47-1.95)  | 0.916   |
| CC               | Ref.            |         | Ref.            |         | Ref.             |         |
| CA+AA            | 0.87(0.71-1.07) | 0.185   | 1.03(0.72-1.48) | 0.870   | 0.79(0.61-1.02)  | 0.070   |
| CC+CA            | Ref.            |         | Ref.            |         | Ref.             |         |
| AA               | 1.08(0.60-1.93) | 0.798   | 1.08(0.37-3.14) | 0.889   | 1.06(0.53-2.13)  | 0.874   |
| <b>Diplotype</b> |                 |         |                 |         |                  |         |
| 1S/1S            | Ref.            |         | Ref.            |         | Ref.             |         |
| 1S/1F            | 0.93(0.71-1.23) | 0.616   | 1.00(0.61-1.63) | 0.999   | 0.93(0.66-1.30)  | 0.665   |
| 1F/1F            | 1.02(0.70-1.47) | 0.934   | 1.95(0.94-4.05) | 0.074   | 0.80(0.51-1.24)  | 0.312   |
| 2/2              | 0.95(0.51-1.77) | 0.867   | 1.13(0.36-3.58) | 0.835   | 0.87(0.41-1.85)  | 0.724   |
| 2/1F             | 0.83(0.60-1.16) | 0.273   | 0.95(0.53-1.73) | 0.873   | 0.78(0.52-1.17)  | 0.231   |
| 2/1S             | 0.84(0.62-1.13) | 0.246   | 1.27(0.73-2.21) | 0.396   | 0.69(0.48-1.00)  | 0.047   |

Models adjusted for age, sex, vitamin D intake, smoking status, body mass index categories, vitamin D deficiency and menopausal status (only women).

**Table S5.** Association of GC gene variants with elevated blood pressure or taking medication for hypertension by sex.

|                  | Total            |         | Men             |         | Women           |         |
|------------------|------------------|---------|-----------------|---------|-----------------|---------|
|                  | OR (95% CI)      | P value | OR (95% CI)     | P value | OR (95% CI)     | P value |
| <b>rs7041</b>    |                  |         |                 |         |                 |         |
| TT               | Ref.             |         | Ref.            |         | Ref.            |         |
| TG               | 0.93(0.73-1.20)  | 0.579   | 0.95(0.61-1.47) | 0.811   | 0.94(0.69-1.28) | 0.683   |
| GG               | 0.99 (0.74-1.34) | 0.987   | 0.93(0.55-1.59) | 0.800   | 1.04(0.72-1.48) | 0.844   |
| TT               | Ref.             |         | Ref.            |         | Ref.            |         |
| GG+GG            | 0.95(0.75-1.20)  | 0.684   | 0.94(0.62-1.43) | 0.786   | 0.97(0.73-1.30) | 0.838   |
| TT+TG            | Ref.             |         | Ref.            |         | Ref.            |         |
| GG               | 1.04(0.81-1.34)  | 0.733   | 0.97(0.62-1.50) | 0.885   | 1.08(0.80-1.46) | 0.622   |
| <b>rs4588</b>    |                  |         |                 |         |                 |         |
| CC               | Ref.             |         | Ref.            |         | Ref.            |         |
| CA               | 1.06(0.84-1.32)  | 0.622   | 1.15(0.78-1.70) | 0.475   | 1.02(0.78-1.35) | 0.864   |
| AA               | 1.06(0.60-1.99)  | 0.849   | 0.80(0.26-2.53) | 0.715   | 1.24(0.58-2.68) | 0.578   |
| CC               | Ref.             |         | Ref.            |         | Ref.            |         |
| CA+AA            | 1.06(0.85-1.31)  | 0.611   | 1.12(0.77-1.64) | 0.546   | 1.04(0.79-1.36) | 0.777   |
| CC+CA            | Ref.             |         | Ref.            |         | Ref.            |         |
| AA               | 1.04(0.56-1.93)  | 0.899   | 0.76(0.25-2.36) | 0.638   | 1.23(0.58-2.64) | 0.590   |
| <b>Diplotype</b> |                  |         |                 |         |                 |         |
| 1S/1S            | Ref.             |         | Ref.            |         | Ref.            |         |
| 1S/1F            | 0.88(0.66-1.19)  | 0.409   | 1.02(0.62-1.69) | 0.932   | 0.81(0.56-1.17) | 0.272   |
| 1F/1F            | 0.87(0.59-1.3)   | 0.510   | 0.84(0.39-1.81) | 0.663   | 0.86(0.53-1.37) | 0.519   |
| 2/2              | 0.93(0.48-1.81)  | 0.838   | 0.74(0.22-2.51) | 0.627   | 1.04(0.46-2.35) | 0.920   |
| 2/1F             | 1.06(0.75-1.51)  | 0.735   | 1.30(0.71-2.40) | 0.395   | 0.95(0.61-1.47) | 0.817   |
| 2/1S             | 0.95(0.69-1.31)  | 0.738   | 1.02(0.57-1.80) | 0.952   | 0.93(0.63-1.38) | 0.716   |

Models adjusted for age, sex, vitamin D intake, smoking status, body mass index categories, vitamin D deficiency and menopausal status (only women).
